# Supplementary material for: Assessing the Healthy Food Partnership’s Proposed Nutrient Reformulation Targets for Foods and Beverages in Australia
Source: PubMed Central journal article supplement (PMC7285116; doi:10.3390/nu12051346), 2020-05-08
Supplement: nutrients-12-01346-s001.pdf [file nutrients-12-01346-s001.pdf]

Supplementary Table S1. FoodSwitch data compared to UK sodium targets

| UK category                                    | FoodSwitch         |                    |                         | Potential targets                    |                             |                             | Products meeting UK maximum target (%) | Already targeted |
|------------------------------------------------|--------------------|--------------------|-------------------------|--------------------------------------|-----------------------------|-----------------------------|----------------------------------------|------------------|
|                                                | Number of products | Mean (SD; mg/100g) | Median (range; mg/100g) | FoodSwitch 33.3 percentile (mg/100g) | UK average target (mg/100g) | UK maximum target (mg/100g) |                                        |                  |
| Bacon                                          | 124                | 1110.3 (346.5)     | 1050 (430-2900)         | 997.0                                | 1150                        | -                           | -                                      | Y                |
| Ham and other cured meats                      | 144                | 1097.7 (382.4)     | 1050 (1.7-4320)         | 995.0                                | 650                         | -                           | -                                      | Partial          |
| Uncooked sausages                              | 186                | 681.6 (219.4)      | 649 (79-1840)           | 581.0                                | 450                         | 550                         | 26.3%                                  | Y                |
| Delicatessen meat pies                         | 195                | 422.6 (121.9)      | 405 (144-930)           | 365.0                                | 390                         | 450                         | 66.7%                                  | Y                |
| Cornish meat pasties                           | 1                  | 562 (.)            | 562 (562-562)           | 562.0                                | 360                         | 400                         | 0.0%                                   | N                |
| Other meat-based pastry                        | 28                 | 453.1 (158)        | 410 (220-951)           | 399.0                                | 270                         | 300                         | 14.3%                                  | N                |
| Whole muscle meat                              | 535                | 421.4 (282.6)      | 379 (30-1570)           | 272.0                                | -                           | 270                         | 32.9%                                  | N                |
| Reformed whole muscle meat                     | 402                | 583.2 (259.9)      | 558 (3.2-1600)          | 449.0                                | -                           | 360                         | 19.9%                                  | Partial          |
| Comminuted or chopped reformed meat            | 63                 | 517.2 (222.6)      | 496 (1-1100)            | 421.0                                | -                           | 540                         | 65.1%                                  | N                |
| Burgers and grill steaks                       | 123                | 461.7 (166.9)      | 434 (55-1050)           | 386.0                                | 300                         | 350                         | 23.6%                                  | N                |
| Fresh chilled frankfurters                     | 30                 | 1065.7 (233.2)     | 1120 (546-1400)         | 995.0                                | 600                         | 750                         | 10.0%                                  | Y                |
| Bread and rolls                                | 817                | 439.1 (151.6)      | 400 (3-1200)            | 390.0                                | 360                         | 450                         | 66.1%                                  | Y                |
| Bread and rolls with additions                 | 82                 | 507.8 (122.1)      | 529.5 (210-824)         | 476.0                                | 400                         | 450                         | 29.3%                                  | N                |
| Morning goods – yeast raised                   | 143                | 318.8 (113.5)      | 310 (1.7-674)           | 270.0                                | 290                         | 350                         | 63.6%                                  | Partial          |
| Morning goods – powder raised                  | 54                 | 436.4 (164.6)      | 400 (90-794)            | 335.0                                | 450                         | 500                         | 70.4%                                  | Partial          |
| Breakfast cereals                              | 941                | 125.3 (221.9)      | 44 (0-5000)             | 15.0                                 | 235                         | 400                         | 94.0%                                  | Partial          |
| Cheddar and other similar hard pressed cheeses | 474                | 679.5 (233.6)      | 651 (1-2600)            | 635.0                                | 700                         | 800                         | 91.6%                                  | Partial          |
| Fresh soft white cheeses                       | 249                | 505.7 (398.7)      | 358 (1-1800)            | 300.0                                | 200                         | 270                         | 26.9%                                  | N                |
| Cottage cheese                                 | 21                 | 219.5 (141)        | 300 (32-419)            | 98.0                                 | 200                         | 210                         | 42.9%                                  | N                |
| Mozzarella                                     | 36                 | 506.3 (211)        | 505 (130-1526.3)        | 417.0                                | 540                         | -                           | -                                      | N                |
| Blue cheese                                    | 50                 | 928.6 (365.1)      | 800 (3.6-1529)          | 710.0                                | 800                         | -                           | -                                      | N                |
| Other processed cheese                         | 73                 | 1165.6 (403)       | 1240 (400-1950)         | 900.0                                | 680                         | 800                         | 30.1%                                  | Y                |
| Salted butters and buttery spreads             | 83                 | 507.2 (209.5)      | 481 (9-1139)            | 380.0                                | 590                         | 670                         | 74.7%                                  | N                |
| Lightly salted butter                          | 27                 | 15 (19.3)          | 10 (0-100)              | 6.0                                  | 450                         | -                           | -                                      | N                |
| Margarines/other spreads                       | 136                | 343.8 (239.5)      | 350 (0-1300)            | 340.0                                | 425                         | 550                         | 88.2%                                  | N                |

|                                                                |      |                 |                  |        |         |         |       |         |
|----------------------------------------------------------------|------|-----------------|------------------|--------|---------|---------|-------|---------|
| Baked beans in tomato sauce without accompaniments             | 79   | 383.5 (480.3)   | 354 (9-4500)     | 280.0  | -       | 225     | 10.1% | N       |
| Ready meals and meal centres                                   | 1068 | 306.7 (149.9)   | 280 (0-2055)     | 241.0  | 250     | 380     | 78.1% | Partial |
| Soups                                                          | 543  | 280.2 (84.2)    | 278 (3-887)      | 260.0  | 210     | 250     | 26.5% | Y       |
| Pizzas                                                         | 159  | 544.7 (175.6)   | 547 (115-1230)   | 470.0  | 400     | 500     | 41.5% | Y       |
| Standard potato crisps                                         | 296  | 570.7 (189.7)   | 540 (7-1460)     | 499.0  | 525     | 580     | 62.2% | Y       |
| Extruded and sheeted snacks                                    | 674  | 612.5 (374.3)   | 564 (0.7-3100)   | 430.0  | 680     | 800     | 78.2% | Partial |
| Salt and vinegar products                                      | 44   | 957.6 (313.8)   | 859.5 (427-1950) | 760.0  | 750     | 1000    | 63.6% | Y       |
| Cakes                                                          | 423  | 274.2 (151.6)   | 252 (0-1170)     | 193.0  | 170     | 280     | 56.7% | Partial |
| Pastries                                                       | 77   | 389.9 (200.3)   | 334 (25-1200)    | 290.0  | 140     | 180     | 6.5%  | N       |
| Sweet pies and other shortcrust or choux pastry based desserts | 124  | 204.6 (92)      | 209 (21-523)     | 150.0  | 100     | 130     | 23.4% | N       |
| Sandwiches with/without high salt fillings                     | 79   | 461.7 (156.2)   | 443 (120-950)    | 386.0  | 360/270 | 600/350 | 79.7% | N       |
| Tomato ketchup                                                 | 73   | 709.1 (327.4)   | 765 (0-1540)     | 583.0  | -       | 680     | 41.1% | N       |
| Brown sauce                                                    | 75   | 781.5 (272.6)   | 770 (0-1360)     | 670.0  | -       | 480     | 14.7% | N       |
| Salad cream                                                    | 83   | 762.4 (251.9)   | 804 (66-1210)    | 715.0  | -       | 630     | 20.5% | N       |
| Mayonnaise (not reduced/reduced fat/calorie)                   | 152  | 597 (222.8)     | 573 (53-1500)    | 500.0  | -       | 500/680 | 33.6% | N       |
| Salad dressing                                                 | 108  | 499.7 (527.7)   | 196.5 (0-1861)   | 20.0   | -       | 600     | 56.5% | N       |
| Cooking and pasta sauce                                        | 629  | 542.6 (756.6)   | 380 (0-8460)     | 338.0  | 300     | 370     | 46.9% | Y       |
| Pesto and other thick sauces                                   | 247  | 869 (776.4)     | 650 (100-4940)   | 429.0  | 550     | 650     | 48.8% | Partial |
| Thick pastes                                                   | 195  | 2023.1 (1861.9) | 1659 (2.1-11000) | 1050.0 | 1300    | 1500    | 46.2% | N       |
| Sweet biscuits                                                 | 1362 | 213.1 (138.8)   | 200 (0-850)      | 140.0  | 220     | 380     | 88.5% | N       |
| Savoury biscuits                                               | 780  | 632.8 (327.3)   | 615.5 (0-2500)   | 490.0  | 520     | 700     | 61.3% | Partial |
| Pasta and noodles, plain and flavoured                         | 333  | 741.7 (786.7)   | 390 (5-3110)     | 295.0  | 200     | 350     | 45.6% | N       |
| Rice (unflavoured), as consumed                                | 232  | 19.2 (58.5)     | 5 (0-560)        | 5.0    | -       | 70      | 94.4% | N       |
| Flavoured rice, as consumed                                    | 100  | 287.3 (200.4)   | 250 (0-1046)     | 205.0  | 180     | 230     | 40.0% | N       |
| Other cereals                                                  | 100  | 435.6 (237.7)   | 419.5 (0-1090)   | 360.0  | 220     | 250     | 20.0% | N       |
| Dessert mixes, as consumed                                     | 41   | 160.3 (161.7)   | 130 (0-725)      | 58.0   | -       | 180     | 65.9% | N       |
| Cheesecake                                                     | 58   | 172 (71.5)      | 165.85 (46-503)  | 136.0  | 110     | 140     | 37.9% | Y       |
| Sponge-based processed puddings                                | 51   | 267.4 (95)      | 272 (70-460)     | 223.0  | 170     | 250     | 47.1% | Y       |
| All other processed puddings                                   | 192  | 172.3 (110)     | 150 (0-570)      | 104.0  | 70      | 110     | 33.9% | Partial |
| Quiches                                                        | 42   | 451.7 (110.7)   | 440 (112-717)    | 410.0  | 220     | 270     | 4.8%  | Y       |
| Canned tuna                                                    | 144  | 346.7 (119.1)   | 341 (120-654)    | 295.0  | 360     | -       | -     | N       |
| Canned salmon                                                  | 72   | 394.1 (173.1)   | 365 (62-1020)    | 358.0  | 320     | -       | -     | N       |
| Other canned fish                                              | 382  | 443.4 (249.5)   | 400 (61-2700)    | 354.0  | 340     | 600     | 91.1% | N       |

|                                 |     |               |               |       |     |     |       |   |
|---------------------------------|-----|---------------|---------------|-------|-----|-----|-------|---|
| Canned and bottled vegetables   | 461 | 200.7 (222.4) | 200 (0-2280)  | 100.0 | -   | 50  | 28.9% | N |
| Plain meat alternatives         | 64  | 223.8 (457.3) | 44 (1-3447)   | 12.0  | -   | 250 | 65.6% | N |
| Meat-free products              | 124 | 517.9 (550.5) | 455 (10-6000) | 370.0 | 360 | 500 | 62.9% | N |
| Meat-free bacon                 | 4   | 804.5 (109.1) | 791 (712-924) | 712.0 | -   | 750 | 50.0% | N |
| Other processed potato products | 97  | 213.6 (148.8) | 225 (0.4-709) | 76.0  | 185 | 275 | 62.9% | N |
| Dried beverages                 | 337 | 113.1 (579.4) | 36 (0-8300)   | 17.0  | -   | 60  | 74.2% | N |
| Stocks                          | 153 | 300.6 (173.4) | 292 (14-1100) | 242.0 | 300 | 380 | 72.9% | Y |
| Gravy                           | 94  | 491.4 (118.4) | 514 (230-720) | 420.0 | 380 | 450 | 40.0% | Y |

---

Supplementary Table S2. FoodSwitch data compared to UK sugar targets

| UK category                     | FoodSwitch         |                   |                        |                                     | Potential targets                 |               |                            |                            |
|---------------------------------|--------------------|-------------------|------------------------|-------------------------------------|-----------------------------------|---------------|----------------------------|----------------------------|
|                                 | Number of products | Mean (SD; g/100g) | Median (range; g/100g) | FoodSwitch 33.3 percentile (g/100g) | AU 20% reduction in mean (g/100g) | UK target     | UK 20% reduction guideline | Already targeted by HFP    |
| Breakfast cereals               | 941                | 15 (9.1)          | 15.7 (0-44.3)          | 10.6                                | 12.0                              | 20% reduction | 12.3                       | Partial (not hot cereals)  |
| Yoghurts                        | 703                | 11.9 (4.2)        | 12.1 (0-34.8)          | 10                                  | 9.5                               | 20% reduction | 11.0                       | Y                          |
| Biscuits                        | 1353               | 30.6 (11)         | 30.6 (0-77)            | 25.6                                | 24.5                              | 20% reduction | 26.2                       | Partial (muesli bars only) |
| Cakes                           | 443                | 32.1 (10.2)       | 31.6 (0.2-61.8)        | 28.3                                | 25.7                              | 20% reduction | 27.9                       | N                          |
| Morning goods                   | 197                | 14.7 (9.4)        | 14.4 (0.1-52.4)        | 9.9                                 | 11.8                              | 20% reduction | 10.0                       | N                          |
| Puddings (i.e. desserts)        | 280                | 33 (11.5)         | 34.3 (2.5-91.7)        | 27.2                                | 26.4                              | 20% reduction | 15.1                       | N                          |
| Ice-cream, lollies, and sorbets | 712                | 25.1 (7.9)        | 23.8 (0-56.2)          | 21.8                                | 20.1                              | 20% reduction | 18.6                       | N                          |
| Chocolate confectionary         | 1593               | 46.8 (14)         | 49.9 (0-99)            | 44.7                                | 37.4                              | 20% reduction | 43.7                       | N                          |
| Sweet confectionary             | 781                | 56.4 (22.2)       | 58.1 (0-100)           | 49.2                                | 45.1                              | 20% reduction | 48.4                       | N                          |
| Chocolate spread                | 46                 | 47.1 (14.5)       | 51.7 (9.6-67.1)        | 48.8                                | 37.7                              | 20% reduction | 43.8                       | N                          |
| Peanut butter                   | 78                 | 8 (4.2)           | 6.5 (4.1-25.2)         | 5.5                                 | 6.4                               | 20% reduction | 3.9                        | N                          |
| Dessert toppings/sauces         | 210                | 57.9 (22.6)       | 55.7 (0-99.3)          | 45.9                                | 46.3                              | 20% reduction | 38.7                       | N                          |
| Fruit spreads                   | 31                 | 57 (6.2)          | 57.5 (46.2-68.8)       | 53.4                                | 45.6                              | 20% reduction | 34.6                       | N                          |
